# Supplementary material for: Iron-oxide-based twin nanoplates with strong T2 relaxation shortening for contrast-enhanced magnetic resonance imaging
Source: Royal Society of Chemistry journal article supplement (doi:10.1039/c8nr04995e), 2018-01-01
Supplement: c8nr04995e1.pdf [file c8nr04995e1.pdf]

## Electronic Supplementary Information

### **Iron-oxide-based twin nanoplates with strong $T_2$ relaxation shortening for contrast-enhanced magnetic resonance imaging**

Ruixue Wei,<sup>a</sup> Tiantian Zhou,<sup>b</sup> Chengjie Sun,<sup>a</sup> Hongyu Lin,<sup>a</sup> Lijiao Yang,<sup>a</sup> Bin W. Ren,<sup>a</sup> Zhong Chen,<sup>b</sup> and  
Jinhao Gao<sup>\*a</sup>

<sup>a</sup>State Key Laboratory of Physical Chemistry of Solid Surfaces, The MOE Laboratory of Spectrochemical Analysis & Instrumentation, and The Key Laboratory for Chemical Biology of Fujian Province, College of Chemistry and Chemical Engineering, Xiamen University, Xiamen 361005, China.

<sup>b</sup>Fujian Key Laboratory of Plasma and Magnetic Resonance, College of Electronic Science and Technology, Xiamen University, Xiamen 361005, China.

\*Email: [jhgao@xmu.edu.cn](mailto:jhgao@xmu.edu.cn)

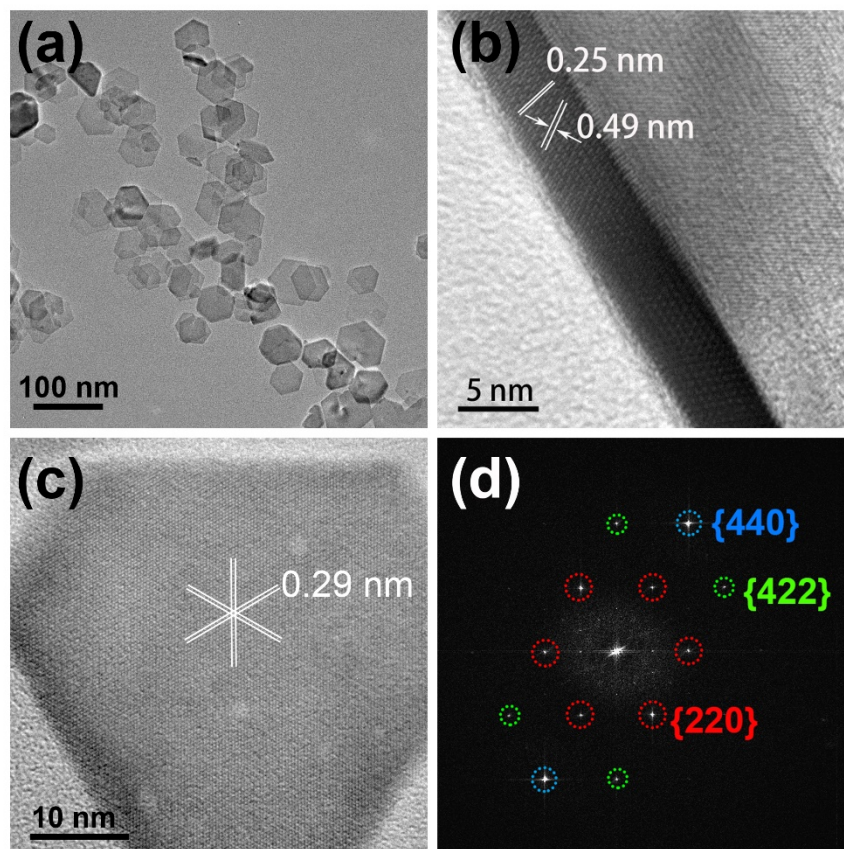

**Fig. S1** A TEM image, HRTEM images and fast fourier transform (FFT) patterns of iron oxide nanoplates with thickness of 3 nm (IOP-3). (a) A TEM image of IOP-3. (b) A side-view HRTEM image of IOP-3, the lattice spacing distance of 0.25 nm and 0.49 nm could be ascribed to the  $\{311\}$  plane and  $\{111\}$  plane, respectively. The crystal zone could be ascribed to  $[0\bar{1}1]$ . (c) A top-view HRTEM image of IOP-3, the crossed lattice spacing distance of 0.29 nm could be attributed to the  $\{220\}$  plane. (d) FFT patterns of (c), showing  $\{111\}$  facets of face-centered cubic (FCC) crystals

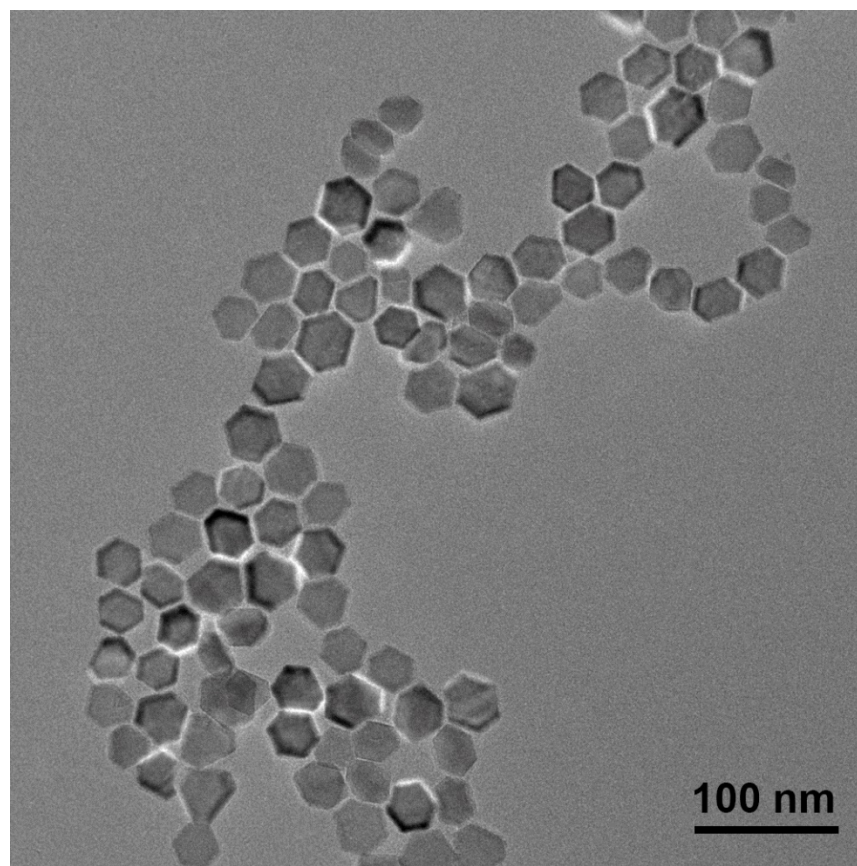

**Fig. S2** A large-area TEM image of IOP-13.

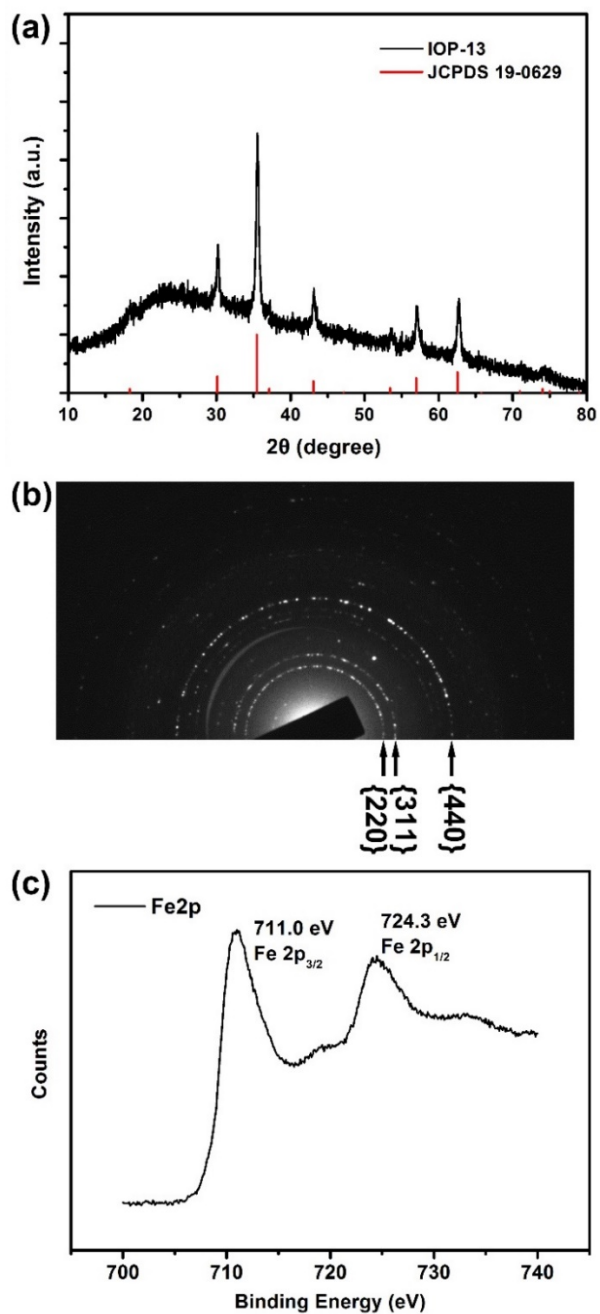

**Fig. S3** (a) X-ray power diffraction (XRD) patterns of IOP-13, the diffraction patterns are in agreement with the magnetite structure (JCPDS NO. 19-0629). Selected area electron diffraction (SAED) patterns (b) and X-ray photoelectron spectroscopy (XPS) (c) of IOP-13 are also consistent with the crystalline nature of magnetite. The peaks of 711.0 and 724.3 eV are assigned to Fe 2p<sub>3/2</sub> and Fe 2p<sub>1/2</sub> of magnetite.

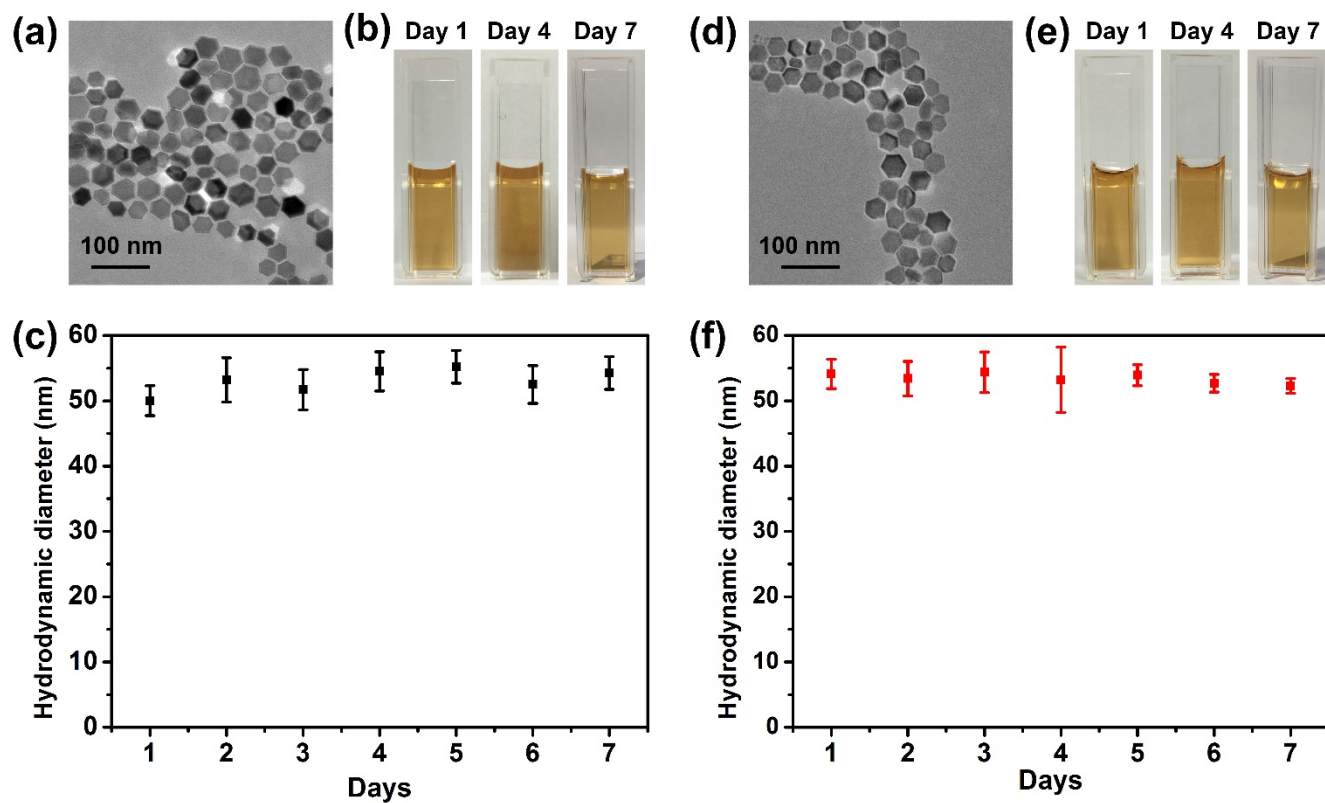

**Fig. S4** The stability of IOP-13 in (a-c) phosphate buffer (PBS, 1×, pH = 7.4) and (d-f) 10% (v/v) fetal bovine serum (FBS) solution. The TEM images of IOP-13 after 7 days incubated with PBS (a) and FBS solution (d). The optical photographs of IOP-13 after incubated with PBS (b) and FBS solution (e). The hydrodynamic diameters of IOP-13 in PBS (c) and FBS solution (f) at different time points.

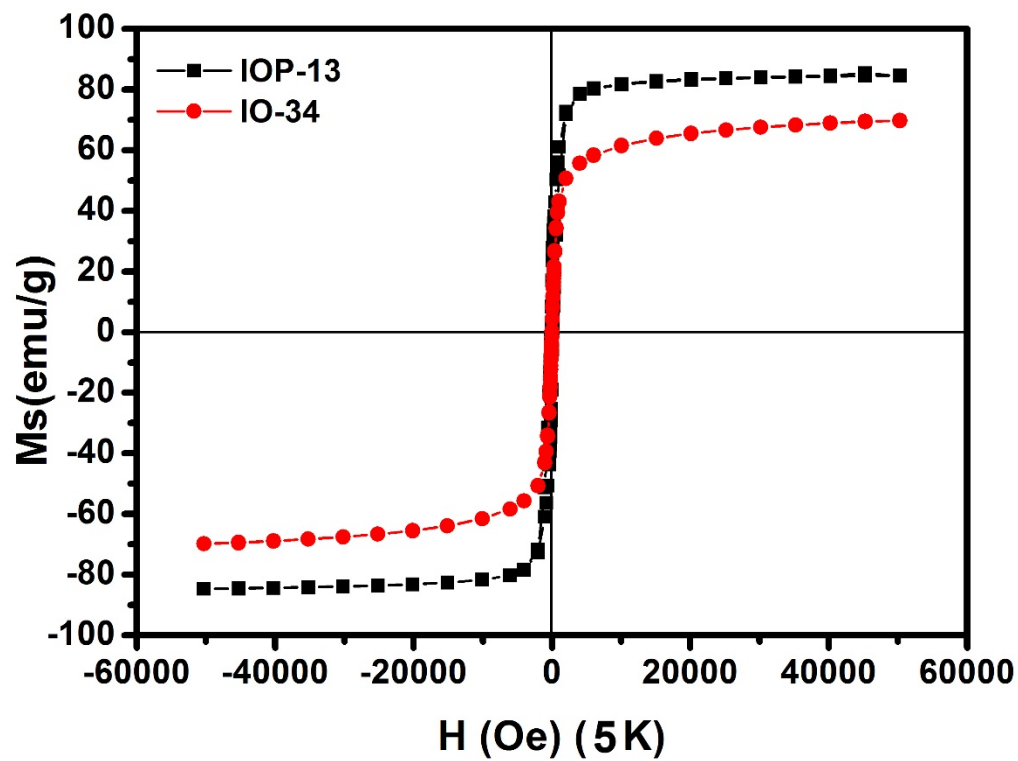

**Fig. S5** Field-dependent magnetization curves ( $M-H$ ) of IOP-13 at 5 K. The  $M_s$  of IOP-13 and IO-34 are 84.4 and 69.7 emu/g, respectively.

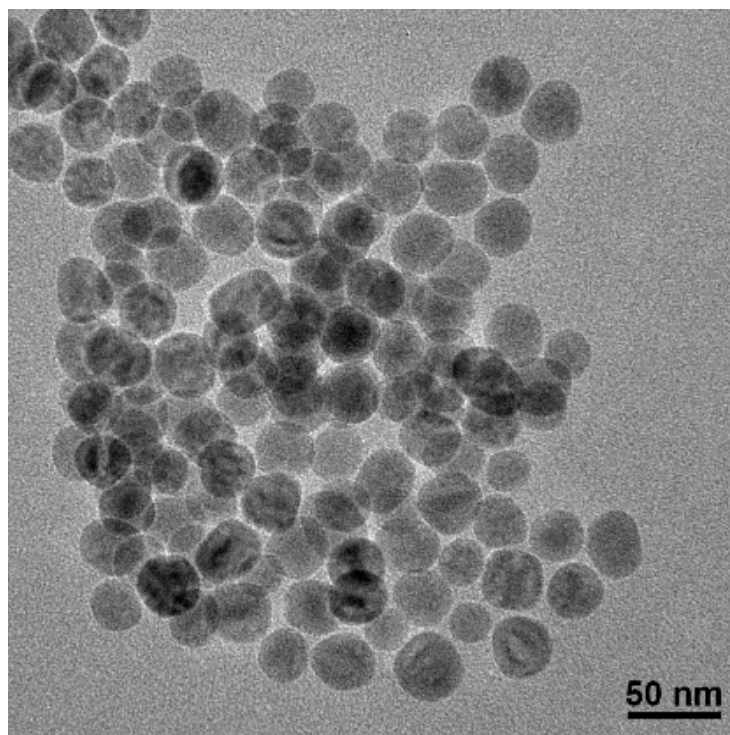

**Fig. S6** A TEM image of as-prepared Fe<sub>3</sub>O<sub>4</sub> nanoparticles (IO-34).

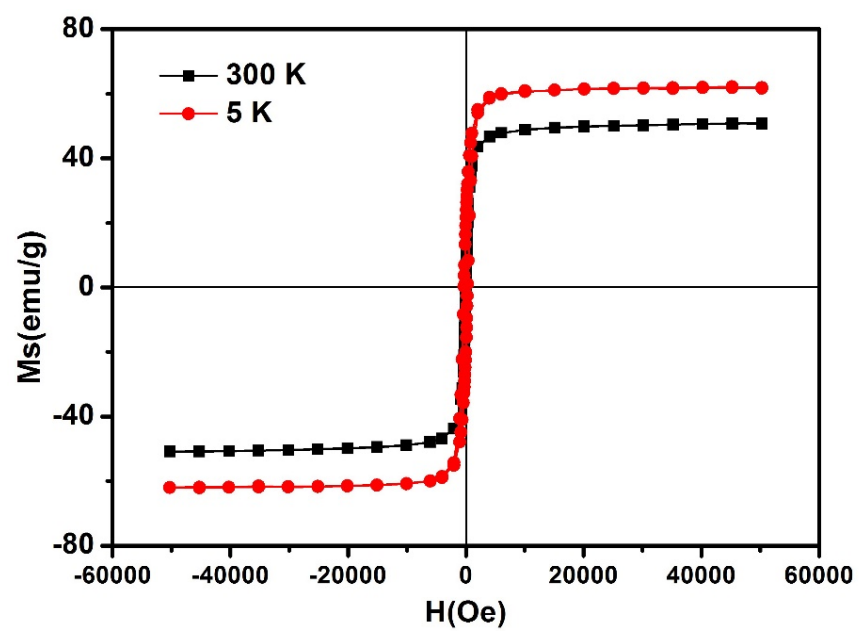

**Fig. S7** Field-dependent magnetization curves ( $M-H$ ) of IOP-3 seeds at 300 K and 5 K.



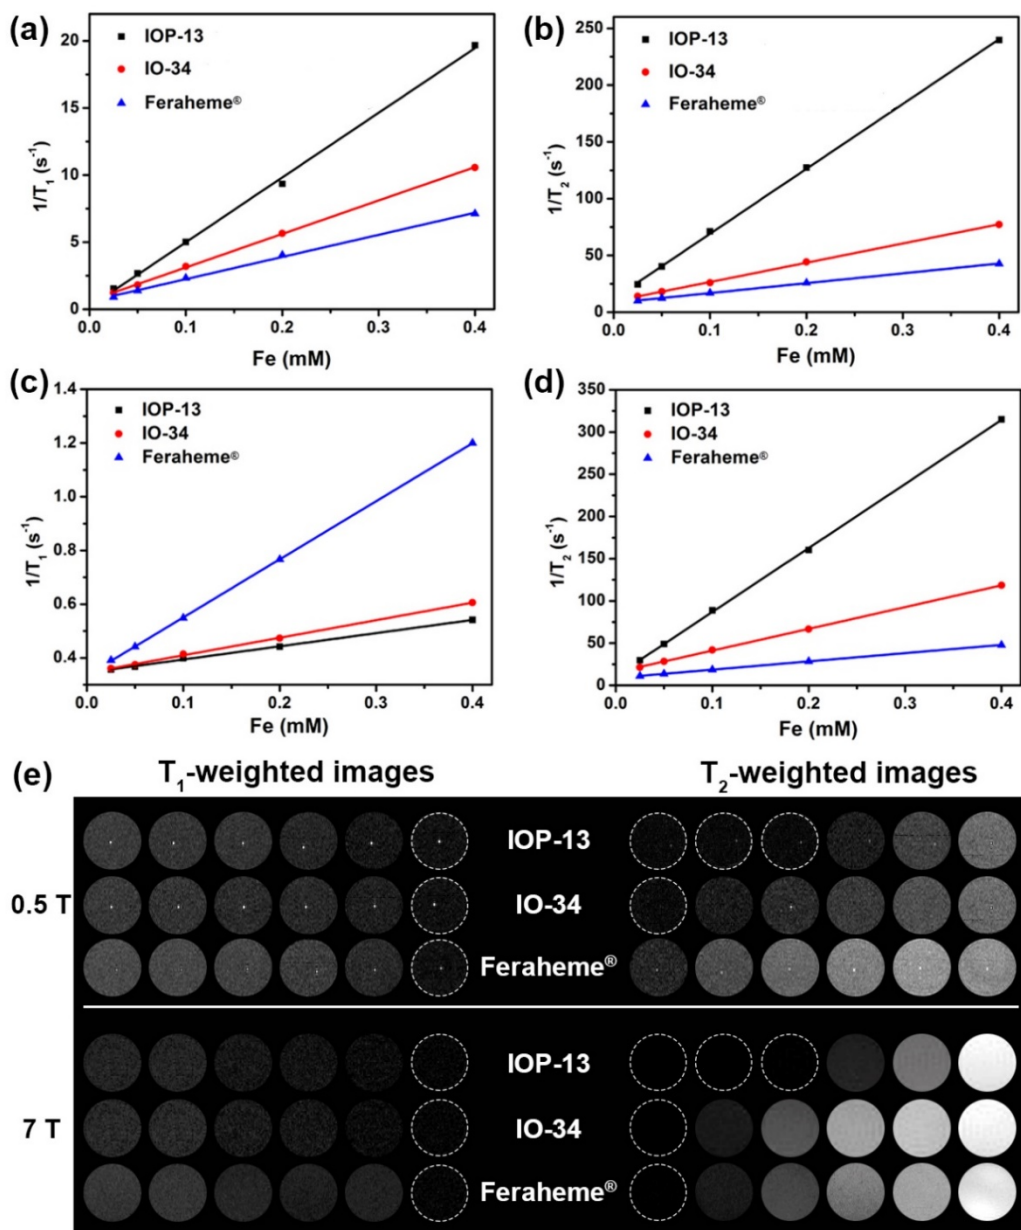

**Fig. S8** Relaxivity profiles,  $T_1$ - and  $T_2$ -weighted phantom imaging at 0.5 and 7 T. (a)  $R_1$  and (b)  $R_2$  of IOP-13, IO-34, and Feraheme<sup>®</sup> with different concentrations at 0.5 T, the  $r_1$  and  $r_2$  values were obtained from the slopes of linear fits. (c)  $R_1$  and (d)  $R_2$  of IOP-13, IO-34, and Feraheme<sup>®</sup> with different concentrations at 7 T, the  $r_1$  and  $r_2$  values were obtained from the slopes of linear fits. (e)  $T_1$ -/ $T_2$ -weighted phantom imaging of IOP-13, IO-34, and Feraheme<sup>®</sup> at 0.5 and 7 T.

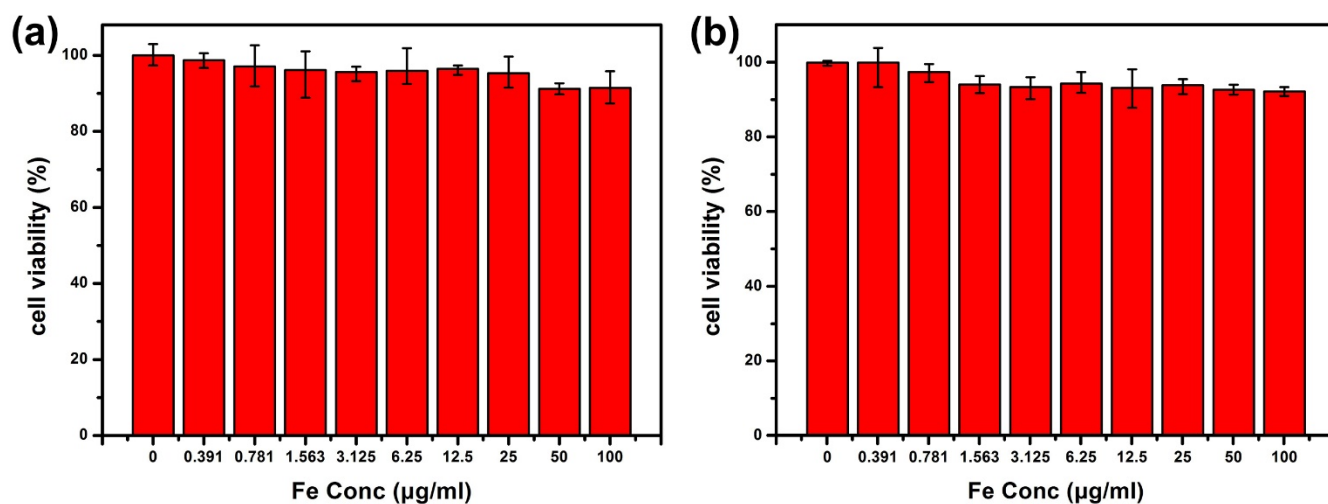

**Fig. S9** Cell viability of SMMC-7721 cells incubated with various concentrations of (a)  $\text{Fe}_3\text{O}_4$  nanoplates (IOP-13) and (b)  $\text{Fe}_3\text{O}_4$  nanoparticles (IO-34) for 24 h. The results show that the cell viabilities are more than 90% even at the concentration of  $100 \mu\text{g} [\text{Fe}] \text{mL}^{-1}$ , indicating that IOP-13 and IO-34 have no appreciable cytotoxicity and excellent biocompatibility.

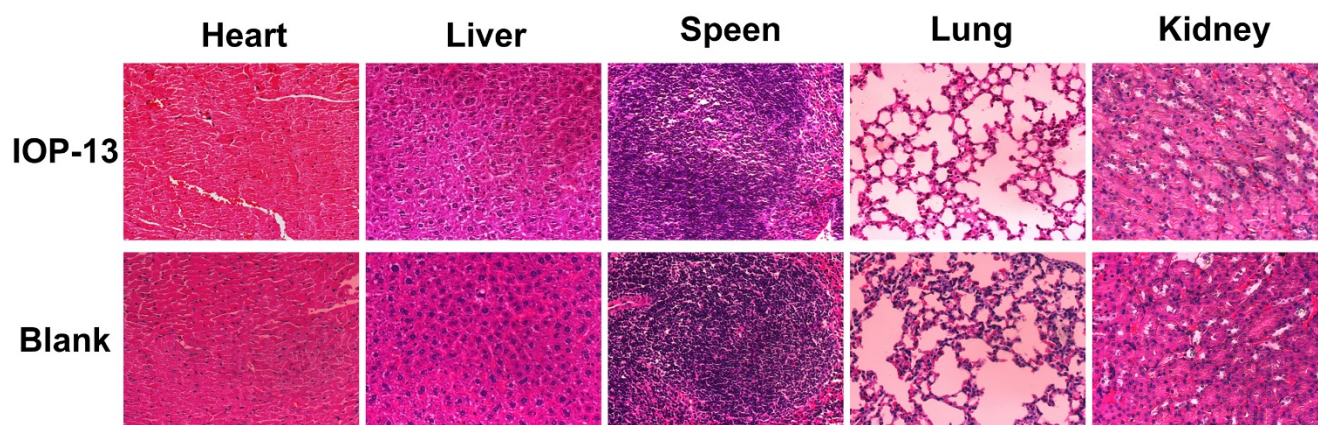

**Fig. S10** Hematoxylin and eosin (H&E) staining of heart, liver, spleen, lung, and kidney of the mice after administration of IOP-13 at a dose of 20 mg Fe per kg body weight. The mice of the control group were injected with the same volume of  $1 \times$  PBS.

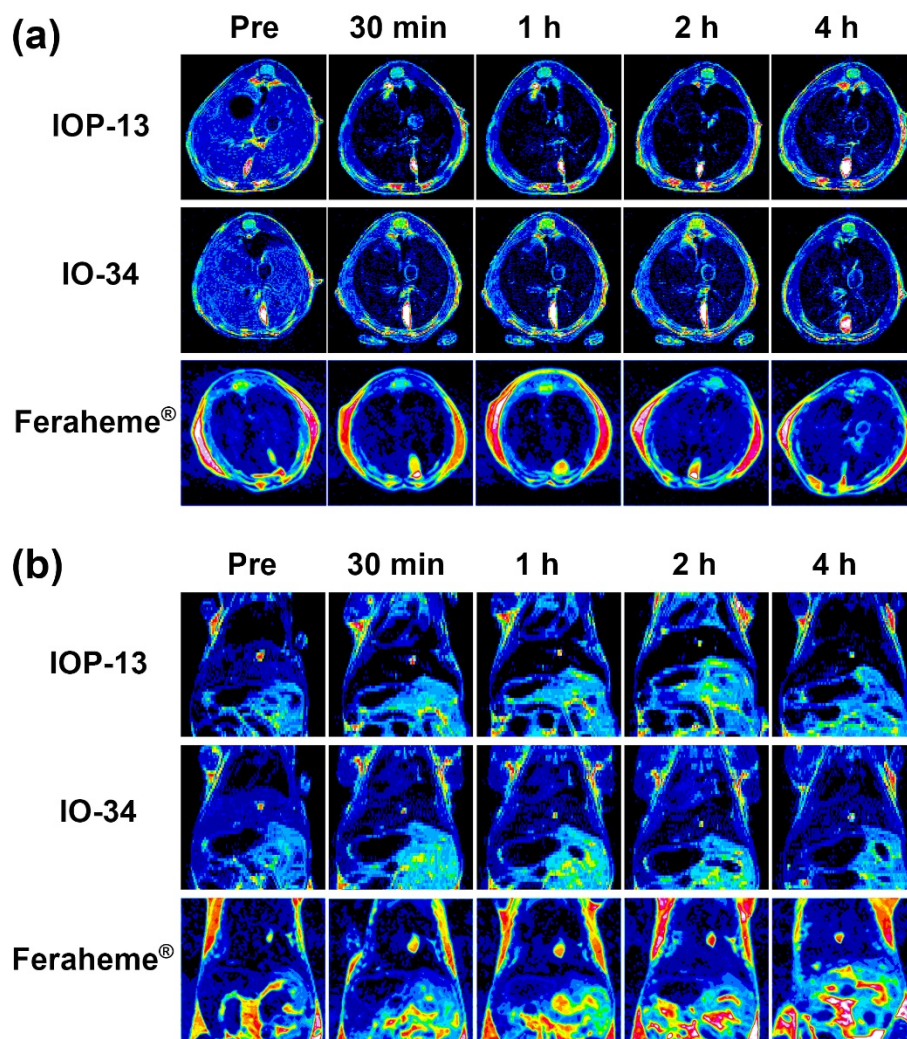

**Fig. S11** *In vivo*  $T_2$ -weighted MR false-color images of liver at 7.0 T. (a)  $T_2$ -weighted MR false-color images in the transverse plane at 0, 0.5, 1, 2, and 4 h after intravenous injection of IOP-13, IO-34 nanoparticles and Feraheme<sup>®</sup> at a dose of 2 mg [Fe]/kg body weight. (b)  $T_2$ -weighted MR false-color images in the coronal plane at 0, 0.5, 1, 2, and 4 h after intravenous injection of IOP-13 and IO-34 nanoparticles at a dose of 2 mg [Fe]/kg body weight.



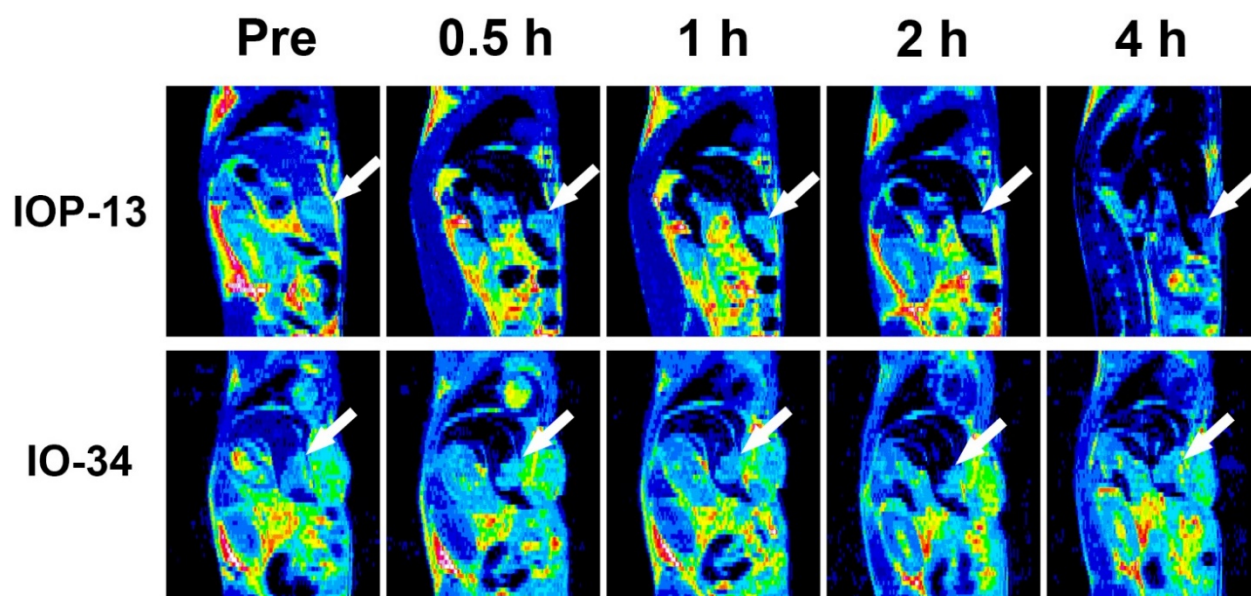

**Fig. S12** *In vivo*  $T_2$ -weighted MR false-color images of liver tumor at 7.0 T.  $T_2$ -weighted MR false-color images in the sagittal plane at 0, 0.5, 1, 2, and 4 h after intravenous injection of IOP-13 and IO-34 nanoparticles at a dose of 2 mg [Fe]/kg body weight. Arrows indicate the location of tumor.

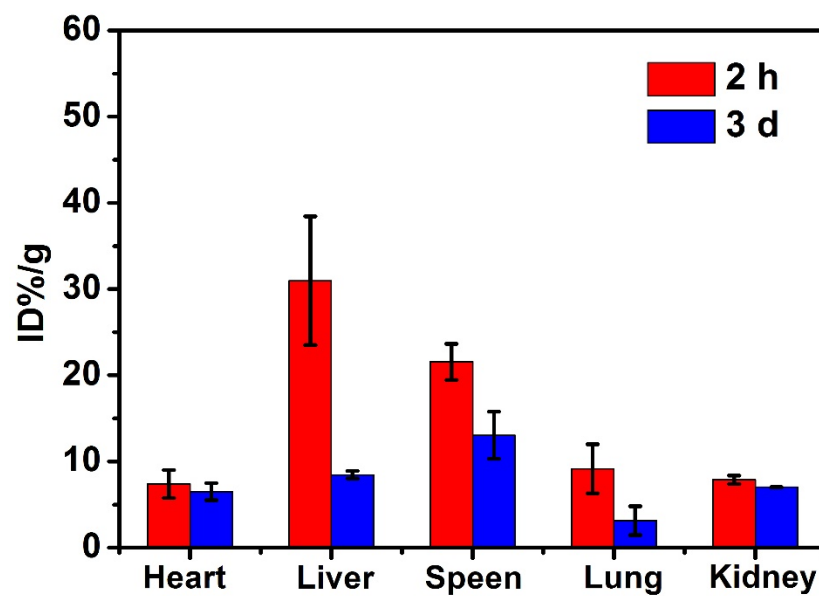

**Fig. S13** Biodistribution of IOP-13 in mice organs at 2 h and 3 d after intravenous injection (2 mg Fe /kg body weight,  $n = 3/\text{group}$ ). The iron contents were measured by ICP-MS and the background was subtracted.

**Table S1.** The  $r_1$  and  $r_2$  values of IOP-13, IO-34, and Feraheme<sup>®</sup> at 0.5 and 7.0 T.

| Sample                | $r_1$ (mM <sup>-1</sup> s <sup>-1</sup> ) |      | $r_2$ (mM <sup>-1</sup> s <sup>-1</sup> ) |        | $r_2/r_1$ |         |
|-----------------------|-------------------------------------------|------|-------------------------------------------|--------|-----------|---------|
|                       | 0.5 T                                     | 7 T  | 0.5 T                                     | 7 T    | 0.5 T     | 7 T     |
| IOP-13                | 48.21                                     | 0.49 | 571.21                                    | 758.04 | 11.85     | 1547.02 |
| IO-34                 | 24.93                                     | 0.65 | 161.02                                    | 257.52 | 6.48      | 396.18  |
| Feraheme <sup>®</sup> | 16.49                                     | 2.16 | 86.85                                     | 98.45  | 5.27      | 45.57   |
